# Supplementary material for: Quercetin Alleviates Endoplasmic Reticulum Stress-Induced Apoptosis in Buffalo Ovarian Granulosa Cells
Source: MDPI journal article supplement (doi:10.3390/ani12060787), 2022-03-20
Supplement: s1 [file s1]

## Supplementary Information

**Table S1.** The primers sequences for q-PCR. *PERK* (Genebank: 102406027), *IRE-1* (102404660), *EIF-2A* (Genebank:102389500), *ATF4* (Genebank:102393344), *ATF6*(Genebank:102394003), *BCL-2*(Genebank:102402077), *BAX*(Genebank:102400076), *Caspase3* (Genebank:102415768), *Caspase9* (Genebank:102412012).

Table S1. Primer sequence.

| Primer     | Primer sequence        |
|------------|------------------------|
| PERK-F     | ATCAGCACTTTAGATGGCCG   |
| PERK-R     | GGTTTGCTAAGGCTGGATGA   |
| IRE1-F     | TTACGATCCCTGAGTTGGTG   |
| IRE1-R     | ATAACGTACCAAATGTCCTGC  |
| EIF-2A-F   | GGAACAGACGCTGCACTAC    |
| EIF-2A-R   | GCTTTGGCAGGCATGAACC    |
| ATF-4-F    | AAACCCTACGACCCTCCTG    |
| ATF-4-R    | GCCCTCTTCTTCTGGCGGTA   |
| ATF-6-F    | GAACCTCAGCCACTTTCGC    |
| ATF-6-R    | CTGAGGAGGGGTTATTGGAGC  |
| BCL-2-F    | GACCCGACGGCAGGAGAA     |
| BCL-2-R    | CCCAAGATGGCTGGAATGAG   |
| BAX-F      | GCAAACCTGGTGCTCAAGGC   |
| BAX-R      | GAGCACTCCAGCCACAAGA    |
| Caspase3-F | AATACCAGTTGAGGCAGA     |
| Caspase3-R | GTCCGAGAACACTCTACG     |
| Caspase9-F | CCTACGTCCTGAATGCAGACCC |
| Caspase9-R | GTGCTCAGCCCCGAGTCCC    |

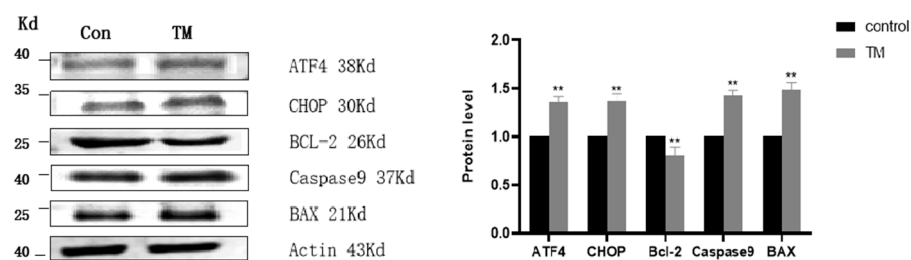

**Figure S1.** Figure 2C Western blot densitometric readings. Effect of TM on ER stress and apoptosis-related proteins. (A) (left) Representative western blot of TM treatment of GCs after 48 h. (right) Densitometry analysis of the western blot in A. The asterisks refer to the level of significance (\*  $p < 0.05$ , \*\*  $p < 0.01$ ).

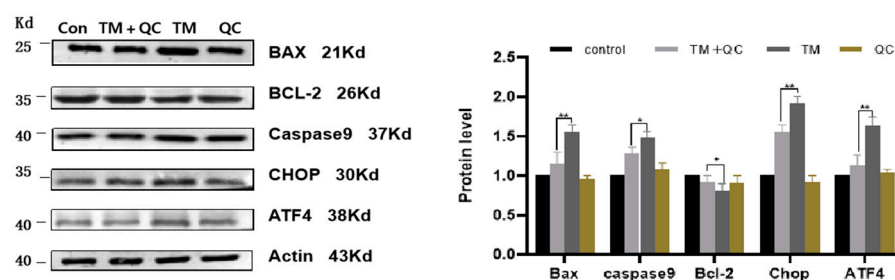

**Figure S2.** Figure 4B Western blot densitometric readings. Effect of quercetin pre-treatment on ER stress and apoptosis-related proteins. (A) (left) Representative western blot of QC pre-treatment of GCs after 8 hours. (right) Densitometry analysis of the western blot in A. The asterisks refer to the level of significance (\*  $p < 0.05$ , \*\*  $p < 0.01$ ).
